# Supplementary material for: Therapeutic deep eutectic solvent-based microemulsion enhances anti-inflammatory efficacy of curcuminoids and aromatic-turmerone extracted from Curcuma longa L
Source: PubMed Central journal article supplement — RSC Adv. 2022 Sep 12;12(40):25912–22. doi: 10.1039/d2ra03656h (PMC9465700; doi:10.1039/d2ra03656h), 2022-09-12
Supplement: RA-012-D2RA03656H-s001.pdf [file RA-012-D2RA03656H-s001.pdf]

## Electronic Supplementary Information (ESI)

**Therapeutic deep eutectic solvent-based microemulsion enhances anti-inflammatory efficacy of curcuminoids and aromatic-turmerone extracted from *Curcuma longa* L.**

**Nassareen Supaweera<sup>a</sup>, Wanatsanan Chulrik<sup>b</sup>, Chutima Jansakun<sup>b</sup>, Phuangthip Bhoopong<sup>b,d</sup>  
Gorawit Yusakul<sup>\*</sup>, Warangkana Chunglok<sup>b,d\*</sup>**

<sup>a</sup>Health Sciences (International Program), College of Graduate Studies, Walailak University, Nakhon Si Thammarat 80160, Thailand

<sup>b</sup>School of Allied Health Sciences, Walailak University, Nakhon Si Thammarat 80160, Thailand

<sup>c</sup>School of Pharmacy, Walailak University, Nakhon Si Thammarat 80160, Thailand

<sup>d</sup>Food Technology and Innovation Research Center of Excellence, Research and Innovation Institute of Excellence, Walailak University, Nakhon Si Thammarat, Thailand

### **\*Corresponding author**

Dr. Warangkana Chunglok

School of Allied Health Sciences, Walailak University, Nakhon Si Thammarat 80160, Thailand

E-mail: cwarang@wu.ac.th and aon.cwarang@gmail.com

Dr. Gorawit Yusakul

School of Pharmacy, Walailak University, Nakhon Si Thammarat 80160, Thailand

E-mail: gorawit.yu@wu.ac.th and gorawit.yu@mail.wu.ac.th

## Table of Contents

|                                                                                                                          | <b>Page</b> |
|--------------------------------------------------------------------------------------------------------------------------|-------------|
| Title page .....                                                                                                         | S1          |
| Table of contents .....                                                                                                  | S2          |
| Table S1. HDES microemulsions after dilution in water (1/1000) .....                                                     | S3          |
| Figure S1. Correlation of extraction yields of Cur and <i>ar</i> -Tur.....                                               | S4          |
| Figure S2. NO inhibition in LPS-activated macrophages by CL extract in ME-71–74.....                                     | S5          |
| Figure S3. NO inhibition in LPS-activated macrophages by CL extract in ME-41–44.....                                     | S6          |
| Figure S4. NO inhibition in LPS-activated macrophages by CL extract in ME-21–25.....                                     | S7          |
| Figure S5. NO inhibition in LPS-activated macrophages by CL extract in organic solvents<br>and Cur in DMSO.....          | S8          |
| Figure S6. Cell viability in LPS-activated macrophages.....                                                              | S9          |
| Figure S7. NO inhibition in LPS-activated macrophages by Cur in DMSO.....                                                | S10         |
| Figure S8. Inflammatory cytokine production and cell viability in LPS-activated<br>differentiated THP-1 macrophages..... | S11         |

**Table S1.** HDES microemulsions after dilution in water (1/1000) ( $n = 3$ , mean  $\pm$  SEM)

| Microemulsion                                            | Components (wt%) |      |       | Blank microemulsion |                 | Microemulsion extracts |                 |
|----------------------------------------------------------|------------------|------|-------|---------------------|-----------------|------------------------|-----------------|
|                                                          | HDES             | Smix | Water | Size (nm)           | PDI             | Size (nm)              | PDI             |
| <b>HDES of octanoic acid:menthol (70:30, mass ratio)</b> |                  |      |       |                     |                 |                        |                 |
| ME-71                                                    | 5                | 90   | 5     | 6.20 $\pm$ 1.16     | 0.46 $\pm$ 0.11 | 8.62 $\pm$ 1.80        | 0.50 $\pm$ 0.04 |
| ME-72                                                    | 15               | 80   | 5     | 2.85 $\pm$ 0.16     | 0.40 $\pm$ 0.06 | 4.18 $\pm$ 0.14        | 0.38 $\pm$ 0.04 |
| ME-73                                                    | 25               | 70   | 5     | 7.43 $\pm$ 0.69     | 0.69 $\pm$ 0.03 | 1.38 $\pm$ 0.07        | 0.72 $\pm$ 0.02 |
| ME-74                                                    | 35               | 60   | 5     | 22.7 $\pm$ 3.7      | 0.38 $\pm$ 0.08 | 8.31 $\pm$ 0.89        | 0.49 $\pm$ 0.02 |
| <b>HDES of octanoic acid:menthol (40:60, mass ratio)</b> |                  |      |       |                     |                 |                        |                 |
| ME-41                                                    | 5                | 90   | 5     | 6.63 $\pm$ 1.74     | 0.46 $\pm$ 0.07 | 3.42 $\pm$ 0.57        | 0.32 $\pm$ 0.03 |
| ME-42                                                    | 15               | 80   | 5     | 1.21 $\pm$ 0.75     | 0.35 $\pm$ 0.13 | 3.40 $\pm$ 0.06        | 0.30 $\pm$ 0.00 |
| ME-43                                                    | 25               | 70   | 5     | 8.43 $\pm$ 0.23     | 0.54 $\pm$ 0.02 | 13.6 $\pm$ 0.1         | 0.63 $\pm$ 0.01 |
| ME-44                                                    | 35               | 60   | 5     | 5.82 $\pm$ 0.21     | 0.41 $\pm$ 0.02 | 9.94 $\pm$ 1.13        | 0.61 $\pm$ 0.05 |
| <b>HDES of octanoic acid:menthol (20:80, mass ratio)</b> |                  |      |       |                     |                 |                        |                 |
| ME-21                                                    | 5                | 90   | 5     | 7.08 $\pm$ 1.83     | 0.54 $\pm$ 0.06 | 5.50 $\pm$ 0.55        | 0.64 $\pm$ 0.09 |
| ME-22                                                    | 15               | 80   | 5     | 10.4 $\pm$ 0.2      | 0.66 $\pm$ 0.01 | 1.96 $\pm$ 0.33        | 0.21 $\pm$ 0.03 |
| ME-23                                                    | 25               | 70   | 5     | 10.2 $\pm$ 0.4      | 0.65 $\pm$ 0.03 | 18.6 $\pm$ 0.1         | 0.63 $\pm$ 0.01 |
| ME-24                                                    | 35               | 60   | 5     | 12.1 $\pm$ 0.2      | 0.80 $\pm$ 0.04 | 3.02 $\pm$ 0.04        | 0.46 $\pm$ 0.01 |
| ME-25                                                    | 45               | 50   | 5     | 12.7 $\pm$ 1.0      | 0.71 $\pm$ 0.02 | 51.3 $\pm$ 6.5         | 0.90 $\pm$ 0.10 |

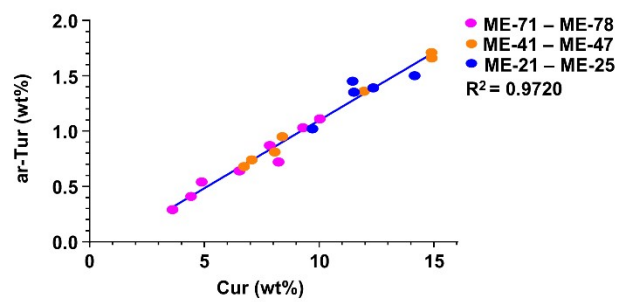

**Figure S1.** Correlation of extraction yields of Cur and *ar*-Tur

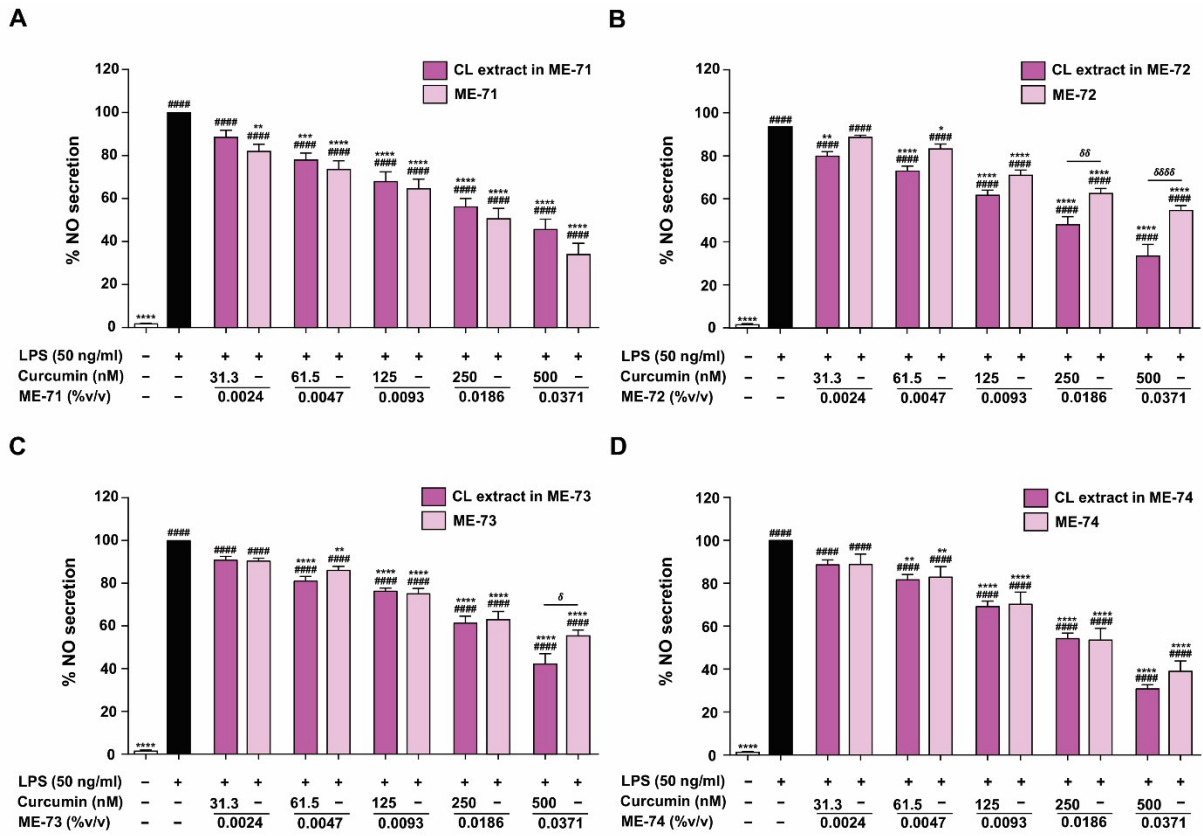

**Figure S2.** NO inhibition in LPS-activated murine macrophages by CL extract in ME-71 (A), CL extract in ME-72 (B), CL extract in ME-73 (C), and CL extract in ME-74 (D). Data are presented as mean  $\pm$  SEM of three independent experiments in triplicate. #### $p < 0.0001$  vs. untreated control; \* $p < 0.05$ , \*\* $p < 0.01$ , \*\*\* $p < 0.0001$  vs. LPS-stimulated cells;  $\delta p < 0.05$ ,  $\delta\delta p < 0.01$ , and  $\delta\delta\delta p < 0.0001$  vs. ME-71, ME-72, ME-73, or ME-74.

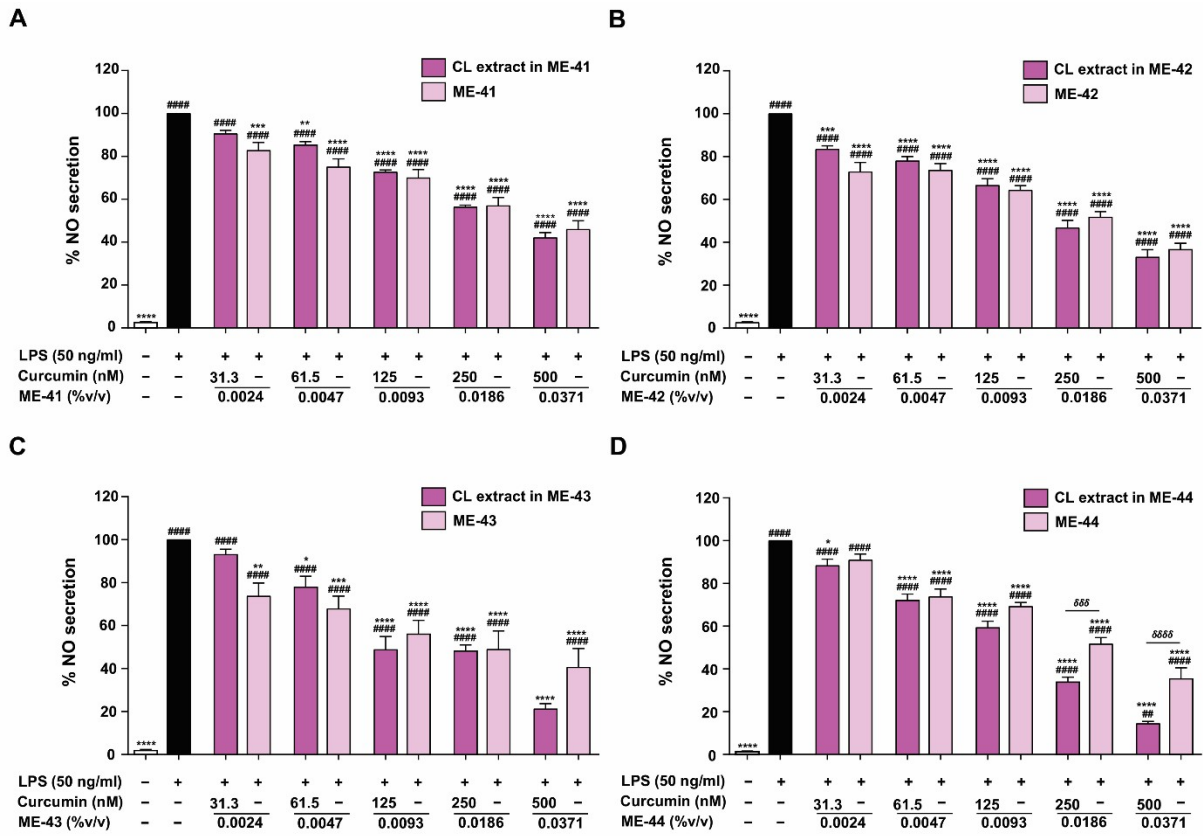

**Figure S3.** NO inhibition in LPS-activated murine macrophages by CL extract in ME-41 (A), CL extract in ME-42 (B), CL extract in ME-43(C), and CL extract in ME-44 (D). Data are presented as mean  $\pm$  SEM of three independent experiments in triplicate. ##  $p < 0.01$ , #####  $p < 0.0001$  vs. untreated control; \*  $p < 0.05$ , \*\*  $p < 0.01$ , \*\*\*  $p < 0.001$ , \*\*\*\*  $p < 0.0001$  vs. LPS-stimulated cells;  $\delta\delta\delta p < 0.001$ ,  $\delta\delta\delta\delta p < 0.0001$  vs. ME-41, ME-42, ME-43, or ME-44.

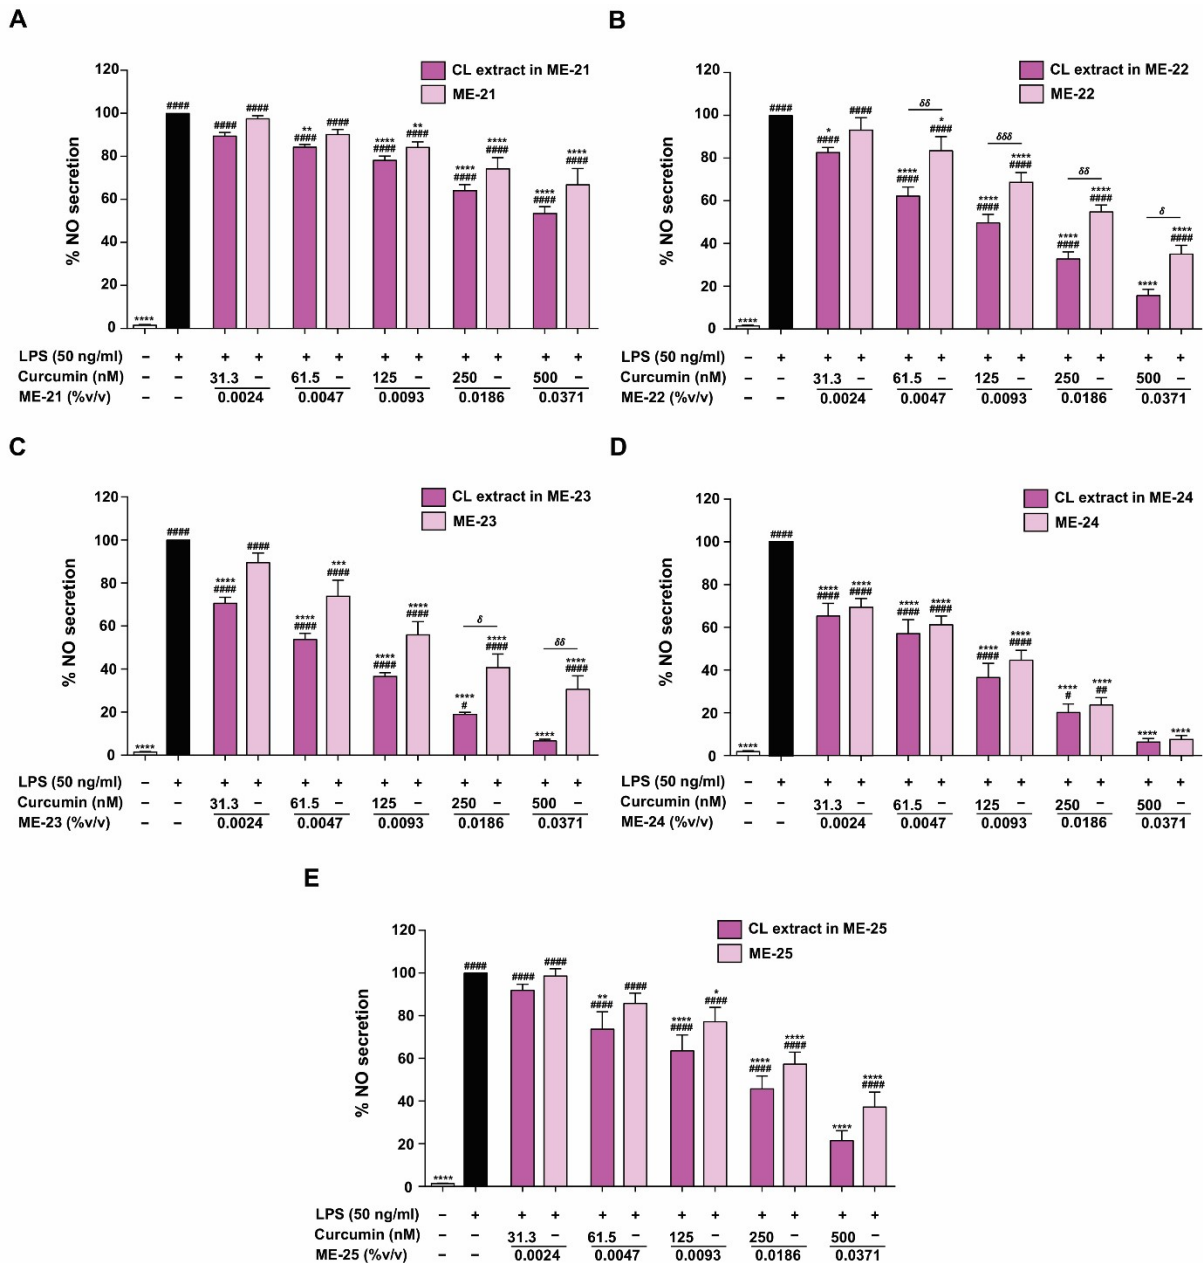

**Figure S4.** NO inhibition in LPS-activated murine macrophages by CL extract in ME-21 (A), CL extract in ME-22 (B), CL extract in ME-23 (C), CL extract in ME-24 (D), and CL extract in ME-25 (E). Data are presented as mean  $\pm$  SEM of three independent experiments in triplicate. # $p$  < 0.05, ## $p$  < 0.01, #### $p$  < 0.0001 vs. untreated control; \* $p$  < 0.05, \*\* $p$  < 0.01, \*\*\* $p$  < 0.001, \*\*\*\* $p$  < 0.0001 vs. LPS-stimulated cells;  $\delta p$  < 0.05,  $\delta\delta p$  < 0.01, and  $\delta\delta\delta p$  < 0.001 vs. ME-21, ME-22, ME-23, ME-24, or ME-25.

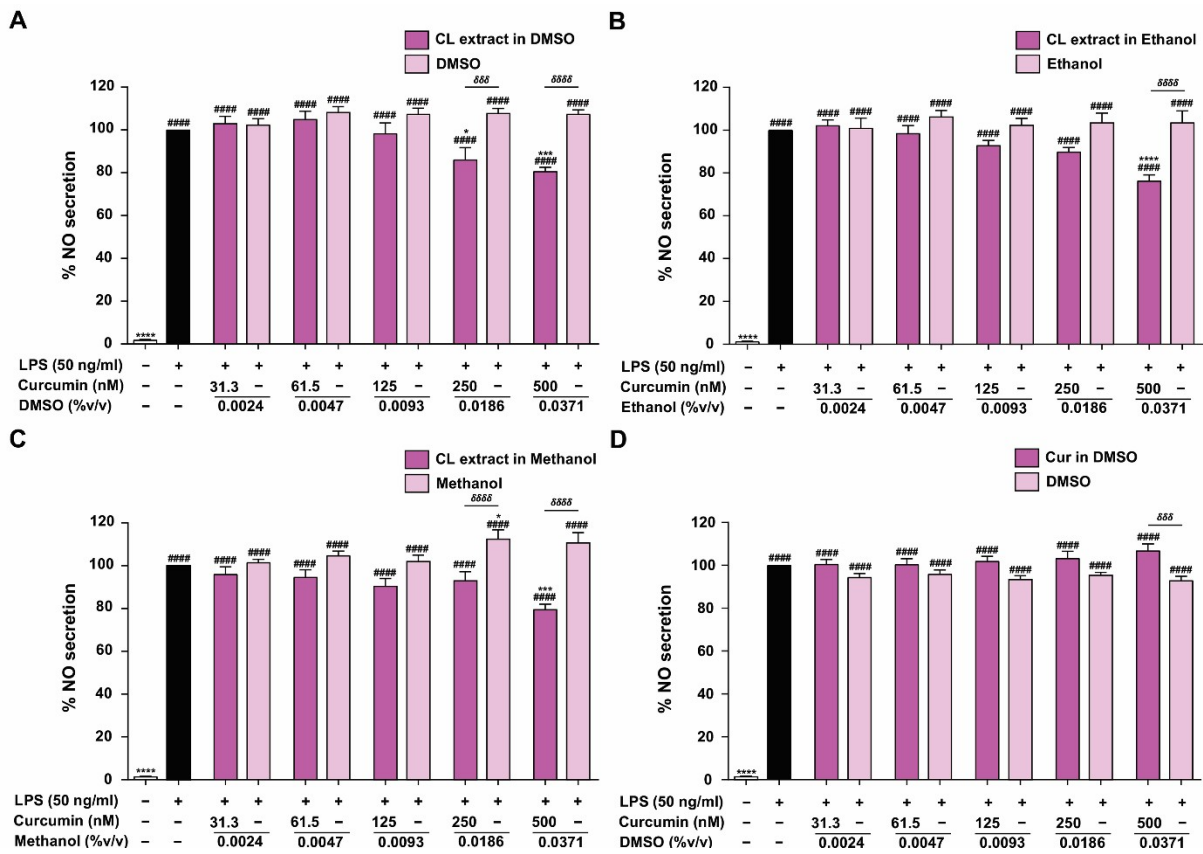

**Figure S5.** NO inhibition in LPS-activated murine macrophages by CL extract in DMSO (A), CL extract in ethanol (B), CL extract in methanol (C), and Cur in DMSO (D). Data are presented as mean  $\pm$  SEM of three independent experiments in triplicate. ##### $p < 0.0001$  vs. untreated control; \* $p < 0.05$ , \*\*\* $p < 0.001$ , \*\*\*\* $p < 0.0001$  vs. LPS-stimulated cells;  $\delta\delta\delta p < 0.001$ ,  $\delta\delta\delta\delta p < 0.0001$  vs. DMSO, ethanol, or methanol



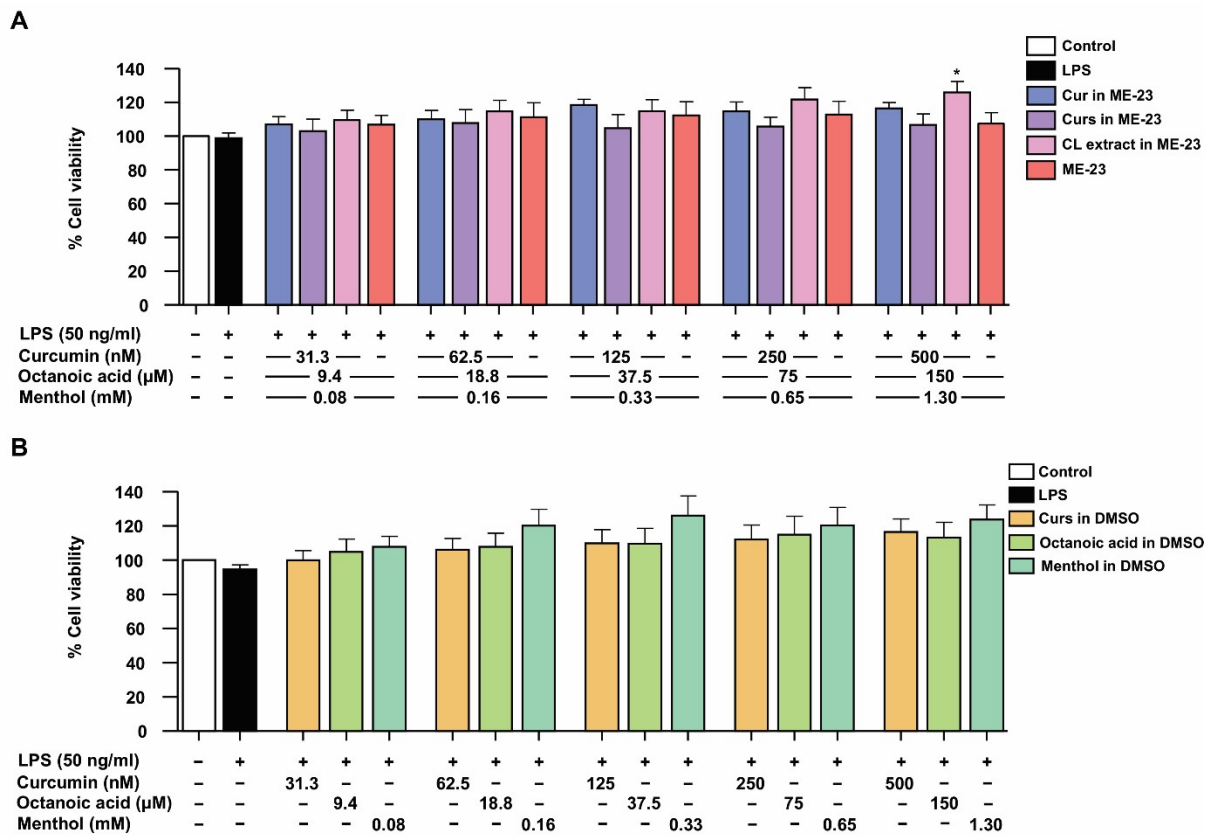

**Figure S6.** Cell viability in LPS-activated murine macrophage by Cur in ME-23, Curs in ME-23, CL extract in ME-23, and ME-23 (A), as well as Curs, octanoic acid, and menthol in DMSO (B). Data are presented as mean  $\pm$  SEM of three independent experiments in triplicate. \* $p < 0.05$  vs. LPS-stimulated cells.

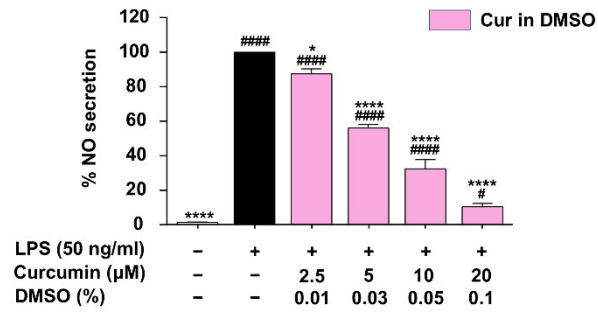

**Figure S7.** NO inhibition in LPS-activated murine macrophages by Cur in DMSO. Data are presented as mean  $\pm$  SEM of three independent experiments in triplicate. # $p < 0.05$ , ##### $p < 0.0001$  vs. untreated control; \* $p < 0.05$ , \*\*\* $p < 0.0001$  vs. LPS-stimulated cells.

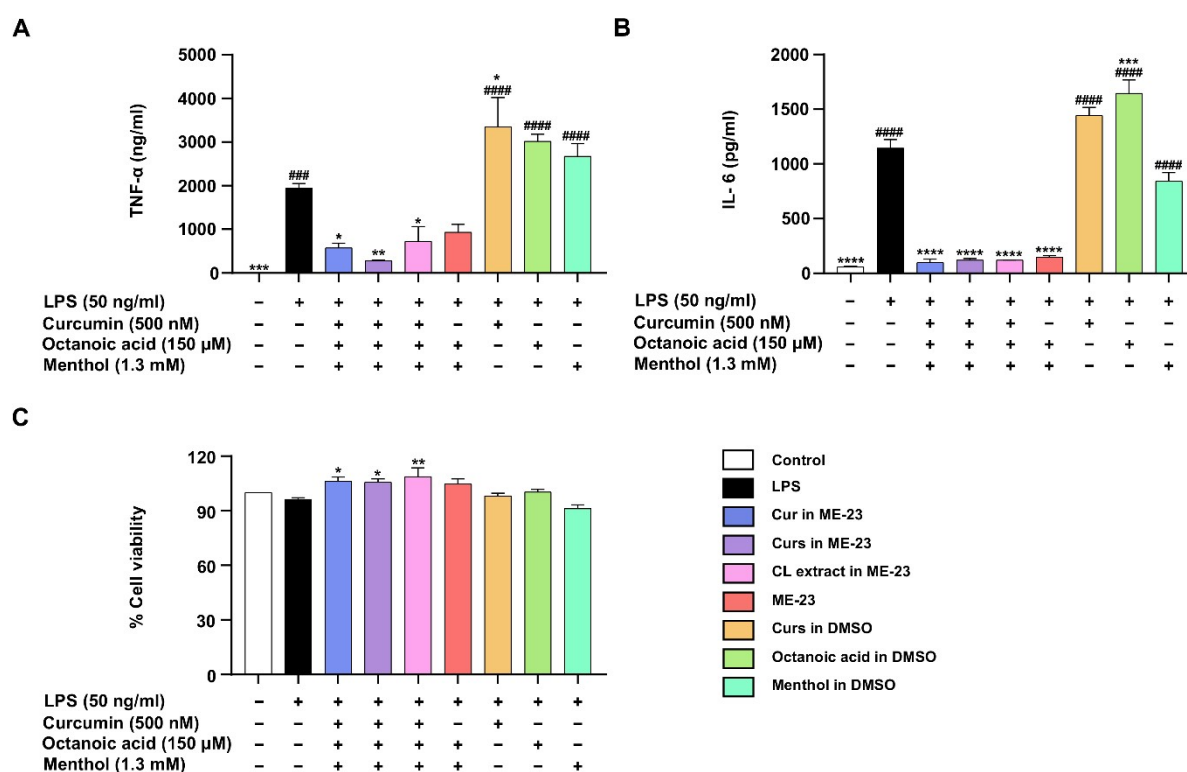

**Figure S8.** Inflammatory cytokine production and cell viability in LPS-activated differentiated THP-1 macrophages. Anti-inflammatory effects of Cur in ME-23, Curs in ME-23, CL extract in ME-23, and ME-23, as well as Curs, octanoic acid, and menthol in DMSO against inflammatory cytokines TNF- $\alpha$  (A) and IL-6 (B) production in LPS-activated differentiated THP-1 macrophages. (C) Cell viability determined by the MTT assay. Data are presented as mean  $\pm$  SEM of three independent experiments. #### $p$  < 0.001, ##### $p$  < 0.0001 vs. untreated control; \* $p$  < 0.05, \*\* $p$  < 0.01 \*\*\* $p$  < 0.001, \*\*\*\* $p$  < 0.0001 vs. LPS-stimulated cells.
